# Supplementary material for: In situ liquid transmission electron microscopy reveals self-assembly-driven nucleation in radiolytic synthesis of iron oxide nanoparticles in organic media
Source: Royal Society of Chemistry journal article supplement (doi:10.1039/d2nr01511k), 2022-01-01
Supplement: d2nr01511k1.pdf [file d2nr01511k1.pdf]

## SUPPORTING INFORMATION

### **In situ liquid transmission electron microscopy reveals self-assembly-driven nucleation in radiolytic synthesis of iron oxide nanoparticles in organic media**

Nathaly Ortiz Peña,<sup>1,2</sup> Dris Ihiawakrim,<sup>1</sup> Sorina Crețu,<sup>1</sup> Geoffrey Cotin,<sup>1</sup> Céline Kiefer,<sup>1</sup> Sylvie Begin-Colin,<sup>1</sup> Clément Sanchez,<sup>3,4</sup> David Portehault,<sup>3</sup> Ovidiu Ersen<sup>1\*</sup>

<sup>1</sup> *Institut de Physique et Chimie des Matériaux de Strasbourg (IPCMS), UMR 7504 CNRS Université de Strasbourg, BP 43 Strasbourg Cedex 2, France*

<sup>2</sup> *Université Paris Cité, CNRS, Laboratoire Matériaux et Phénomènes Quantiques, 75013 Paris, France*

<sup>3</sup> *Sorbonne Université, CNRS, Collège de France, Laboratoire de Chimie de la Matière Condensée de Paris (CMCP), 4 place Jussieu, F-75005, Paris, France*

<sup>4</sup> *University of Strasbourg Institute for Advanced Studies (USIAS), 67083 Strasbourg, France*

*\* corresponding author*

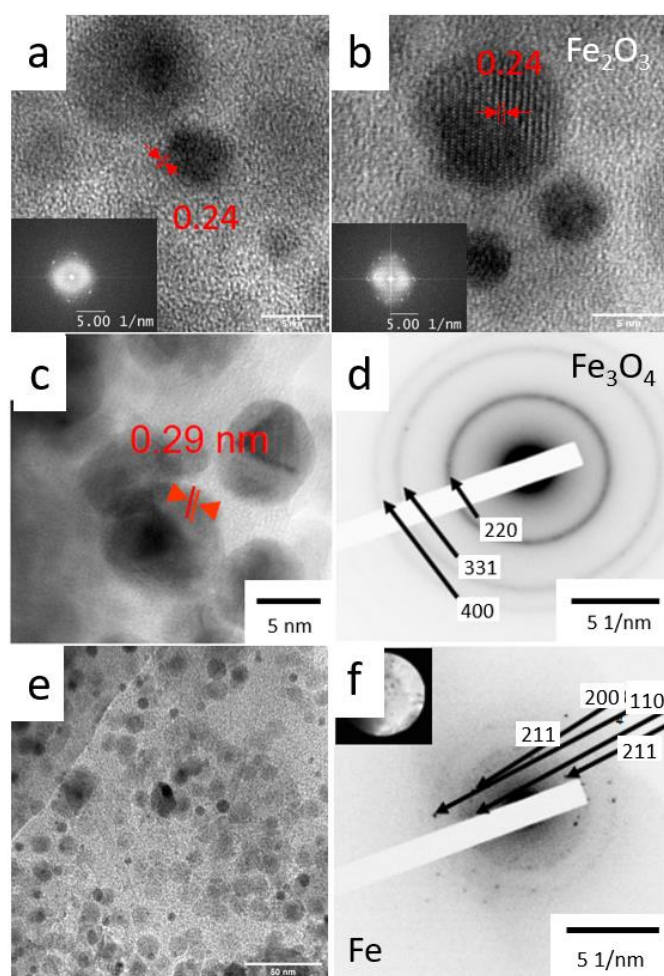

**Figure S1.** HRTEM images (a-c and e) and corresponding SAED pattern of c and e (d and f respectively) of nanoparticles of iron oxide spinel and metallic iron nanoparticles obtained by *in situ* liquid-phase radiolytic decomposition within the transmission electron microscope. These particles are analyzed *post mortem*, after blanking the electron beam and drying the *in situ* cell out of the microscope. The Selected Area Electron Diffraction pattern is indexed along a typical iron oxide spinel and metallic iron nanoparticles structure. Fe may arise from reduction under the electron beam.

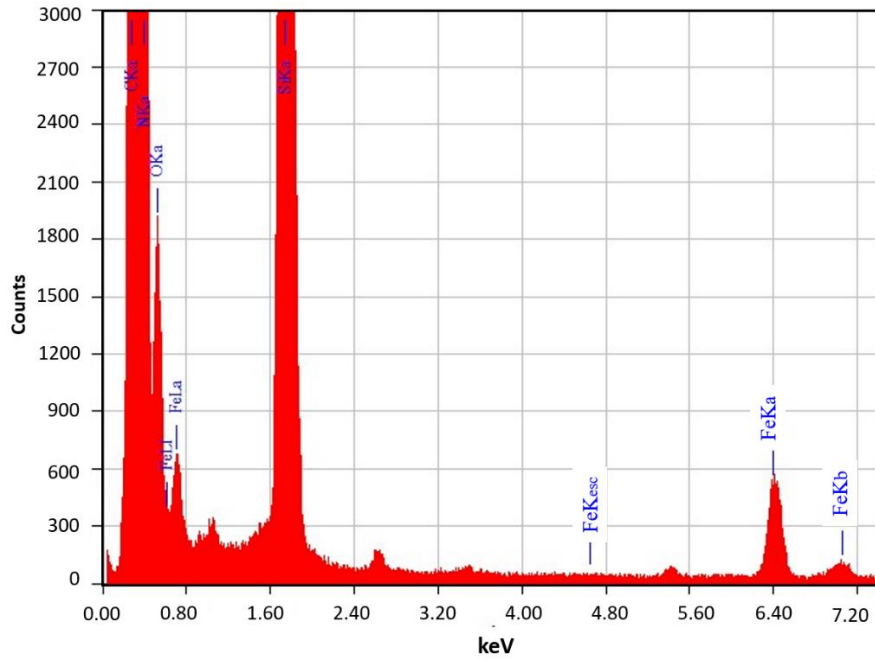

**Figure S2.** Energy dispersive spectrum obtained during the *in situ* experiment depicted in Figure 2. The signature K $\alpha$  of iron was detected at 6.40 keV.

#### MAXIMUM TEMPERATURE RISE CALCULATION DUE TO THE ELECTRON BEAM<sup>1</sup>

$$\Delta T_{max} = \frac{S 10^2}{\pi \alpha_{th} C_p} I \left( 1 + \frac{t}{\lambda} \right) \left( \frac{1}{4} + \frac{1}{2} \ln \left[ \frac{L}{a} \right] \right)$$

I = beam current; a = beam radius; t = thickness; L = Window size;  $\lambda$  = Mean free path

| Parameter                                                                                                    | Water              | Organic solvent                  |
|--------------------------------------------------------------------------------------------------------------|--------------------|----------------------------------|
| <b>S = stopping power (MeV cm<sup>2</sup> g<sup>-1</sup>) (200 kV)</b>                                       | 2.79 <sup>2</sup>  | 2.99 (paraffin wax) <sup>2</sup> |
| <b>C<sub>p</sub> = specific heat at constant pressure (J mol<sup>-1</sup> K<sup>-1</sup>) (300 K)</b>        | 75.28              | 564.4 (octadecane) <sup>3</sup>  |
| <b><math>\alpha_{th}</math> = thermal diffusivity (10<sup>-6</sup> m<sup>2</sup> s<sup>-1</sup>) (300 K)</b> | 0.148 <sup>4</sup> | 0.06 (octadecane) <sup>5</sup>   |

Hence,

$$\Delta T_{max-Water} < 4 K$$

$$\Delta T_{max-Octadecane} < 10 K$$

**Supporting movie S1.** Decomposition of the iron (II) stearate  $\text{FeSt}_2$  in 80% of sodium oleate and 20% of oleic acid surfactants in octadecene. No nuclei are initially observed. Apparition of vesicle-like structures.

**Supporting movie S2.** Octadecene under irradiation.

**Supporting movie S3.** Dynamic interaction of vesicles upon irradiation. Apparition of nuclei upon bursting of the vesicles.

**Supporting movie S4.** Nucleation and growth under TEM illumination at a high electron dose of  $9400 \text{ e}^-/\text{nm}^2\cdot\text{s}$ .

**Supporting movie S5.** Nucleation and growth under TEM illumination at a medium electron dose of  $6900 \text{ e}^-/\text{nm}^2\cdot\text{s}$ .

**Supporting movie S6.** Nucleation and growth under TEM illumination at a low electron dose of  $2500 \text{ e}^-/\text{nm}^2\cdot\text{s}$ .

**Supporting movie S7.** Nucleation and growth under STEM illumination at a low electron dose of  $900 \text{ e}^-/\text{nm}^2\cdot\text{s}$ .

**Supporting movie S8.** Nucleation and growth under STEM illumination at a low electron dose of  $230 \text{ e}^-/\text{nm}^2\cdot\text{s}$ .

## REFERENCES

- (1) Schneider, N. M. Electron Beam Effects in Liquid Cell TEM and STEM. In *Liquid Cell Electron Microscopy*; Cambridge University Press, 2017; pp 140–163.
- (2) Berger, M. J.; Seltzer, S. M. *Stopping Powers and Ranges of Electrons and Positrons*; 1983.
- (3) U.S. Secretary of Commerce on behalf of the United States of America. Octadecane <https://webbook.nist.gov/cgi/cbook.cgi?ID=C593453&Units=SI&Mask=FFF> (accessed Oct 14, 2019).
- (4) Water - Thermal Diffusivity [https://www.engineeringtoolbox.com/water-steam-thermal-diffusivity-d\\_2058.html](https://www.engineeringtoolbox.com/water-steam-thermal-diffusivity-d_2058.html) (accessed Oct 14, 2019).
- (5) Vélez, C.; Khayet, M.; Ortiz De Zárate, J. M. Temperature-Dependent Thermal Properties of Solid/Liquid Phase Change Even-Numbered n-Alkanes: N-Hexadecane, n-Octadecane and n-Eicosane. *Appl. Energy* **2015**, *143*, 383–394.
